# Supplementary material for: Diagnostic and Prognostic Protein Biomarkers of β-Cell Function in Type 2 Diabetes and Their Modulation with Glucose Normalization
Source: MDPI journal article supplement (doi:10.3390/metabo12030196), 2022-02-22
Supplement: s1 [file s1]

**Supplementary Table S1. The 43 proteins previously reported as prognostic and/or diagnostic for development of type 2 diabetes (T2D) that were measured in the T2D and control cohorts in this study.**

|                                    | UniProt        | EntrezGeneSymbol | Target                | Preferred Name |
|------------------------------------|----------------|------------------|-----------------------|----------------|
| <b>Prognostic &amp; Diagnostic</b> | Q15848         | ADIPOQ           | Adiponectin           | ADIPOQ         |
|                                    | Q9NQ30         | ESM1             | Endocan               | ESM1           |
|                                    | Q15828         | CST6             | Cystatin M            | CST6           |
|                                    | P04196         | HRG              | HRG                   | HRG            |
|                                    | P01009         | SERPINA1         | a1-Antitrypsin        | SERPINA1       |
|                                    | P12318         | FCGR2A           | FCG2A                 | FCGR2A         |
|                                    | P31994         | FCGR2B           | FCG2B                 | FCGR2B         |
|                                    | P10721         | KIT              | SCF sR                | KIT            |
|                                    | P03951         | F11              | Coagulation Factor XI | F11            |
|                                    | Q6UX15         | LAYN             | Layilin               | LAYN           |
|                                    | Q9BU40         | CHRD1            | CRDL1                 | CHRD1          |
|                                    | Q9BZZ2         | SIGLEC1          | Sialoadhesin          | SIGLEC1        |
|                                    | O00533         | CHL1             | CHL1                  | CHL1           |
| <b>Prognostic only</b>             | P07339         | CTSD             | Cathepsin D           | CTSD           |
|                                    | O60911         | CTSV             | Cathepsin V           | CTSV           |
|                                    | P32004         | L1CAM            | NCAM-L1               | L1CAM          |
|                                    | P00746         | CFD              | Factor D              | CFD            |
|                                    | Q00535, Q15078 | CDK5 CDK5R1      | CDK5/p35              | CDK5           |
|                                    | P02671, P02675 | FGA FGB FGG      | Fibrinogen            | FGA            |
|                                    | P02679         |                  |                       |                |
|                                    | P22748         | CA4              | Carbonic Anhydrase IV | CA4            |

|        |      |                      |      |
|--------|------|----------------------|------|
| Q9NS85 | CA10 | Carbonic Anhydrase X | CA10 |
| Q13253 | NOG  | Noggin               | NOG  |
| Q9NR61 | DLL4 | DLL4                 | DLL4 |
| P05231 | IL6  | IL-6                 | IL6  |
| Q9UK05 | GDF2 | GDF2                 | GDF2 |
| P12830 | CDH1 | Cadherin E           | CDH1 |
| P01584 | IL1B | IL-1b                | IL1B |

**Diagnostic only**

|        |          |                      |          |
|--------|----------|----------------------|----------|
| Q9Y337 | KLK5     | kallikrein 5         | KLK5     |
| Q9Y5K2 | KLK4     | Kallikrein 4         | KLK4     |
| Q99062 | CSF3R    | G-CSF-R              | CSF3R    |
| P55289 | CDH12    | Cadherin-12          | CDH12    |
| P08833 | IGFBP1   | IGFBP-1              | IGFBP1   |
| Q03154 | ACY1     | Aminoacylase-1       | ACY1     |
| Q9Y264 | ANGPT4   | Angiopoietin-4       | ANGPT4   |
| P13725 | OSM      | OSM                  | OSM      |
| P22692 | IGFBP4   | IGFBP-4              | IGFBP4   |
| P23280 | CA6      | Carbonic anhydrase 6 | CA6      |
| P28908 | TNFRSF8  | CD30                 | TNFRSF8  |
| O75015 | FCGR3B   | FCG3B                | FCGR3B   |
| Q9BZR6 | RTN4R    | Nogo Receptor        | RTN4R    |
| P48357 | LEPR     | sLeptin R            | LEPR     |
| P02751 | FN1      | Fibronectin          | FN1      |
| P20333 | TNFRSF1B | TNF sR-II            | TNFRSF1B |
